# Supplementary material for: Comparative performances of machine learning methods for classifying Crohn Disease patients using genome-wide genotyping data
Source: PubMed Central journal article supplement (PMC6637191; doi:10.1038/s41598-019-46649-z), 2019-07-17
Supplement: 41598_2019_46649_MOESM1_ESM.pdf [file 41598_2019_46649_MOESM1_ESM.pdf]

# Comparative performances of machine learning methods for classifying Crohn Disease patients using genome-wide genotyping data.

## Supplementary Information Text

Alberto Romagnoni, Simon Jégou, Kristel Van Steen, Gilles Wainrib, Jean-Pierre Hugot and International Inflammatory Bowel Disease Genetics Consortium (IIBDGC)

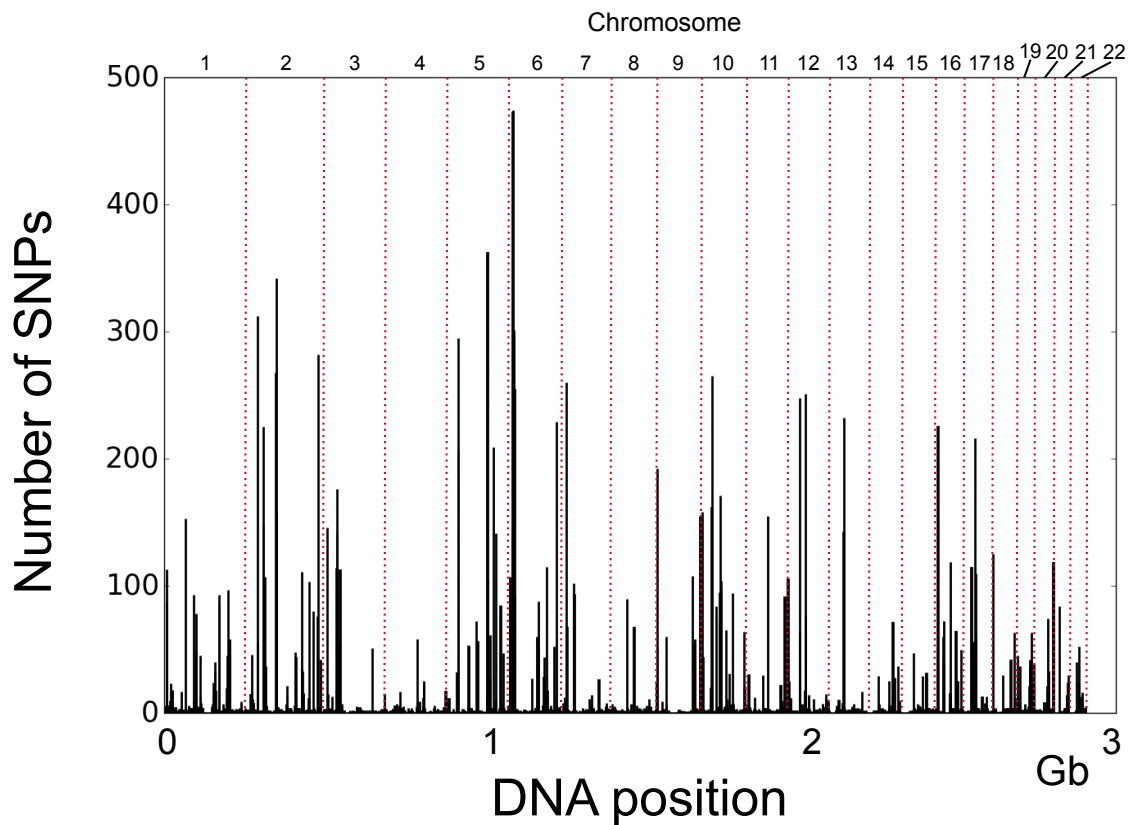

**Fig. S1. Preselected SNPs density on DNA.**

We show the number of SNPs per window of 500 kb, as a function of the position in the DNA (units are Gb =  $10^9$  bases pairs). Dotted red vertical lines indicate the separation between different chromosomes. Chromosome labels are also indicated on the top of the figure.

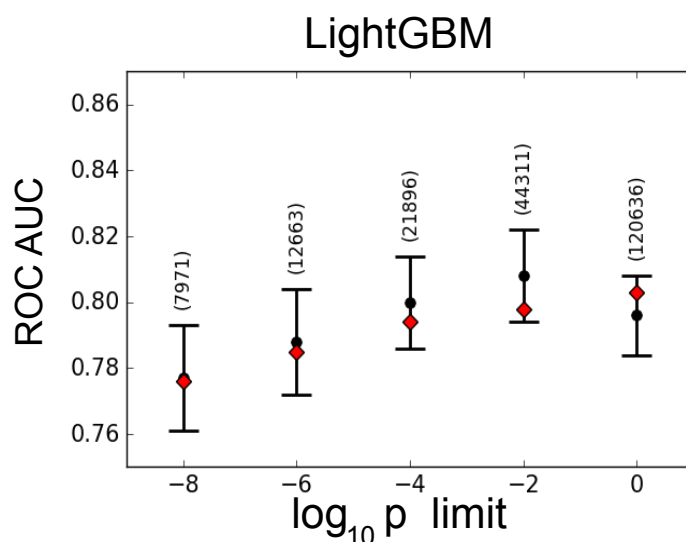

**Fig. S2. ROC AUC scores for LightGBM models, for different preselections.**

Black dots and error bars refer to mean values and 2 standard deviation confidence intervals for 10 fold cross-validated models on the train dataset. Red diamonds refer to AUC scores obtained on the test dataset with the model trained on the entire train dataset, using the corresponding cross validated hyper-parameters. The numbers in parenthesis on top of the error bars refer to the number of original SNP features in the dataset. We show the AUC scores for different values of the upper bound on p-values for the SNP preselection phase.

## Details about hyper-parameters optimization, settings and architectures

The hyper-parameters of the different models have been optimized through standard 10-fold cross-validation (CV) on the Train test. To have control on overfitting, each model has been trained for different sets of parameters, and optimal values have been defined as those that maximize the mean AUC values over the validation folds. These optimal values have been then kept for the final models trained on the whole Train set and tested on the Test set.

### Logistic Regression

We have used Scikit-Learn [1] classifier *sklearn.linear\_model.LogisticRegression* and fixed by CV the hyper-parameters:

- $C_1$ : inverse of regularization strength for l1 penalization,
- $C_2$ : inverse of regularization strength for l2 penalization.

For the ElasticNet case, we used *sklearn.linear\_model.SGDClassifier* and CV over the hyper-parameters:

- **alpha**: a constant that multiplies the regularization term,
- **l1\_ratio**: the Elastic Net mixing parameter.

We list in the following the hyper-parameter values which gave the best mean AUC score under CV.

### Pre-processing -- Table 1

NoQC / Unkw /OHE:  $C_1 = \exp(-3.5)$

NoQC / Maj /sum :  $C_1 = \exp(-3)$

NoQC / HW<sub>c</sub> /sum :  $C_1 = \exp(-3.5)$

QC/ Unkw /OHE :  $C_1 = \exp(-3.5)$   
QC/ Maj /sum :  $C_1 = \exp(-3)$   
QC/ HW<sub>a</sub> /sum :  $C_1 = \exp(-3.5)$   
QC/ HW<sub>c</sub> /raw :  $C_1 = \exp(-3.5)$   
QC/ HW<sub>c</sub> /OHE :  $C_1 = \exp(-3.5)$   
QC/ HW<sub>c</sub> /sum :  $C_1 = \exp(-3.5)$

### Different pre-selection p-values thresholds (MAF>0.01) -- Fig. 2A

Pre-selection  $p < 10^{-8}$  :  $C_1 = \exp(-2.5)$   
Pre-selection  $p < 10^{-7}$  :  $C_1 = \exp(-2.5)$   
Pre-selection  $p < 10^{-6}$  :  $C_1 = \exp(-3)$   
Pre-selection  $p < 10^{-5}$  :  $C_1 = \exp(-3)$   
Pre-selection  $p < 10^{-4}$  :  $C_1 = \exp(-3.5)$   
Pre-selection  $p < 10^{-3}$  :  $C_1 = \exp(-3.5)$   
Pre-selection  $p < 10^{-2}$  :  $C_1 = \exp(-3.5)$   
Pre-selection  $p < 10^{-1}$  :  $C_1 = \exp(-4)$   
Pre-selection  $p < 10^0$  :  $C_1 = \exp(-4)$

### Different pre-selection MAF thresholds ( $p < 10^{-4}$ ) -- Fig. 2B

Pre-selection MAF > 0.001 :  $C_1 = \exp(-3.5)$   
Pre-selection MAF > 0.005 :  $C_1 = \exp(-3.5)$   
Pre-selection MAF > 0.01 :  $C_1 = \exp(-3.5)$   
Pre-selection MAF > 0.05 :  $C_1 = \exp(-3.5)$

### Different ratios Cases/Controls -- Fig. 2C

ratio cases/controls = 0.53 :  $C_1 = \exp(-3.5)$   
ratio cases/controls = 0.75 :  $C_1 = \exp(-3.5)$   
ratio cases/controls = 1 :  $C_1 = \exp(-3.5)$   
ratio cases/controls = 1.25 :  $C_1 = \exp(-3.5)$   
ratio cases/controls = 1.5 :  $C_1 = \exp(-3.5)$

### Different regularization -- Fig. 2D

Lasso (l1) :  $C_1 = \exp(-3.5)$   
Ridge (l2) :  $C_2 = \exp(-7.5)$   
ElasticNet (l1+l2) :  $\alpha = \exp(-3.15)$ ,  $\beta = \exp(-4)$

## Neural Networks

Neural networks have been implemented in Keras [2] on top of Tensorflow [3]. In particular we made use of Keras functional API and of pre-implemented layers Input, Dense, Activation, BatchNormalization, Dropout and Add.

We used Adam optimizer, with learning rate lr and default parameters choice  $\beta_1 = 0.9$ ,  $\beta_2 = 0.999$ ,  $\epsilon = 1e-08$  and  $\text{loss} = \text{'binary\_crossentropy'}$ . We used 312 as batch size for training.

Although for all final models we used a fixed value for lr, we also tried learning rate schedules (based on epochs, or based on performance on the validation set), but this did not improve the results.

### Dense NN with one fully connected hidden layer, but with a variable number of neurons

We used the architecture:

*Input*

*Dense*( $N_h$ , *kernel\_initializer*='glorot\_uniform'),

*BatchNormalization*

*Activation*('sigmoid')

*Dropout*( $\mathbf{d}$ )

*Dense*(1, *activation*='sigmoid', *kernel\_initializer*='glorot\_uniform', *kernel\_regularizer*= $l1(\mathbf{C})$ )

We optimized under CV the learning rate  $\mathbf{lr}$ , the dropout coefficient  $\mathbf{d}$ , the  $l1$  regularization parameter  $\mathbf{C}$ , and the number  $\mathbf{E}$  of epochs for training. We obtained  $\mathbf{lr}= 0.00001$ ,  $\mathbf{d} = 0.3$  and:

For  $N_h=2$  :  $\mathbf{C} = 0.01$  ,  $\mathbf{E} = 100$

For  $N_h=4$  :  $\mathbf{C} = 0.01$  ,  $\mathbf{E} = 75$

For  $N_h=8$  :  $\mathbf{C} = 0.01$  ,  $\mathbf{E} = 75$

For  $N_h=16$  :  $\mathbf{C} = 0.001$ ,  $\mathbf{E} = 75$

For  $N_h=32$  :  $\mathbf{C} = 0.1$  ,  $\mathbf{E} = 75$

For  $N_h=64$  :  $\mathbf{C} = 0.01$  ,  $\mathbf{E} = 50$

For  $N_h=128$  :  $\mathbf{C} = 0.1$  ,  $\mathbf{E} = 75$

For  $N_h=256$  :  $\mathbf{C} = 0.1$  ,  $\mathbf{E} = 100$

For  $N_h=512$  :  $\mathbf{C} = 0.1$  ,  $\mathbf{E} = 100$

For  $N_h=1024$  :  $\mathbf{C} = 0.1$  ,  $\mathbf{E} = 25$

For  $N_h=2048$  :  $\mathbf{C} = 0.001$ ,  $\mathbf{E} = 25$

We also checked that already for  $N_h=2$  the model could overfit training data after few thousand epochs.

### **Dense NN with different numbers of fully connected hidden layers, all composed by 64 neurons**

We used the architecture:

*Input*

*for i in range*( $N_L$ ):

*Dense*(64, *kernel\_initializer*='glorot\_uniform'),

*BatchNormalization*

*Activation*('sigmoid')

*Dropout*( $\mathbf{d}$ )

*Dense*(1, *activation*='sigmoid', *kernel\_initializer*='glorot\_uniform', *kernel\_regularizer*= $l1(\mathbf{C})$ )

We optimized under CV the number  $\mathbf{E}$  of epochs for training. We fixed  $\mathbf{lr}= 0.00001$ ,  $\mathbf{d} = 0.3$ ,  $\mathbf{C} = 0.1$  and

For  $N_L=2$  :  $\mathbf{E} = 50$

For  $N_L=3$  :  $\mathbf{E} = 50$

For  $N_L=4$  :  $\mathbf{E} = 50$

For  $N_L=5$  :  $\mathbf{E} = 50$

For  $N_L=6$  :  $\mathbf{E} = 50$

For  $N_L=7$  :  $\mathbf{E} = 75$

For  $N_L=8$  :  $\mathbf{E} = 75$

### **Dense NN with different odd numbers of fully connected hidden layers, all composed by 64 neurons, with full pre-activated residual blocks**

By defining a block  $h_i = B(H_{i-1})$  as the sequence:

*for j in range*(2):

*BatchNormalization*

*Activation*('sigmoid')

*Dropout*( $\mathbf{d}$ )

*Dense*(64, *kernel\_initializer*='glorot\_uniform')

with input  $H_{i-1}$  and output  $h_i$ , we used the architecture:

*Input*

$H_0 = \text{Dense}(64, \text{kernel\_initializer}='glorot\_uniform')$ ,

for  $i$  in range( $1, N_B$ ):

$h_i = B(H_{i-1})$

$H_i = \text{Add}(H_{i-1}, h_i)$

$\text{Dense}(1, \text{activation}='sigmoid', \text{kernel\_initializer}='glorot\_uniform', \text{kernel\_regularizer}=l1(C))$

We optimized under CV the number  $E$  of epochs for training. We fixed  $lr = 0.00001$ ,  $d = 0.3$ ,  $C = 0.1$  and

For  $N_B = 1$  (3 hidden layers) :  $E = 125$

For  $N_B = 2$  (5 hidden layers):  $E = 100$

For  $N_B = 3$  (7 hidden layers):  $E = 75$

For  $N_B = 4$  (9 hidden layers):  $E = 75$

## Gradient Boosting Trees

We used classifiers of XGBoost [4] ('objective':'binary:logistic'), LightGBM [5] ('objective': 'binary', 'metric':'binary\_logloss') and CatBoost [6] (CatBoostClassifier, loss\_function='Logloss').

All these models have tenth of parameters to tune, but we focused CV only on those which are known to affect the most the final score. We left the others at their default values.

We list in the following the hyper-parameter values which gave the best mean AUC score under CV.

### XGBoost -- Fig. 3D

```
num_round=10000,  
eta=0.01,  
min_child_weight = 8,  
alpha=0.5,  
lambda= 5,  
gamma = 1,  
subsample=0.7,  
colsample_bytree = 0.9.
```

### LightGBM -- Fig. 3D

```
num_round=10000,  
learning_rate =0.05,  
max_depth= 8,  
lambda_l1= 0.1,  
lambda_l2 =1,  
num_leaves = 25,  
feature_fraction= 0.6.
```

### Catboost -- Fig. 3D

```
iterations=10000,  
learning_rate=0.05,  
depth=4,  
l2_leaf_reg=5.
```

## Complementary results on feature importance selection

In the main text, we have studied the importance of the features selected by the different models when the same criterion (permutation feature importance score) is used or when other ranking scores (weights or gain) are considered. In this section, we show some complementary results concerning the problem of determining the most important features for the Crohn case-control study.

### Dependence on the number of permutations

The permutation feature importance score is obtained by randomly permuting on the at the level of each feature on the test set. The larger the deviation from the original AUC, the highest was the rank importance of the feature. However, this result is not very reliable at the level of a single permutation, because random effects related to the limited sample size can affect the score. Therefore, the final score for each feature appear to be more consistent when obtained after averaging over the scores given by several different permutations. In Fig. S2 we show the results for the Spearman rank test on logistic regression with Lasso regularization, LightGBM and the ResDN3 neural network, respectively for the first 50 and 400 loci, when the number of permutations per features over which we averaged is varied. One can see how around  $N=10$  permutations the results seem to converge to stable values.

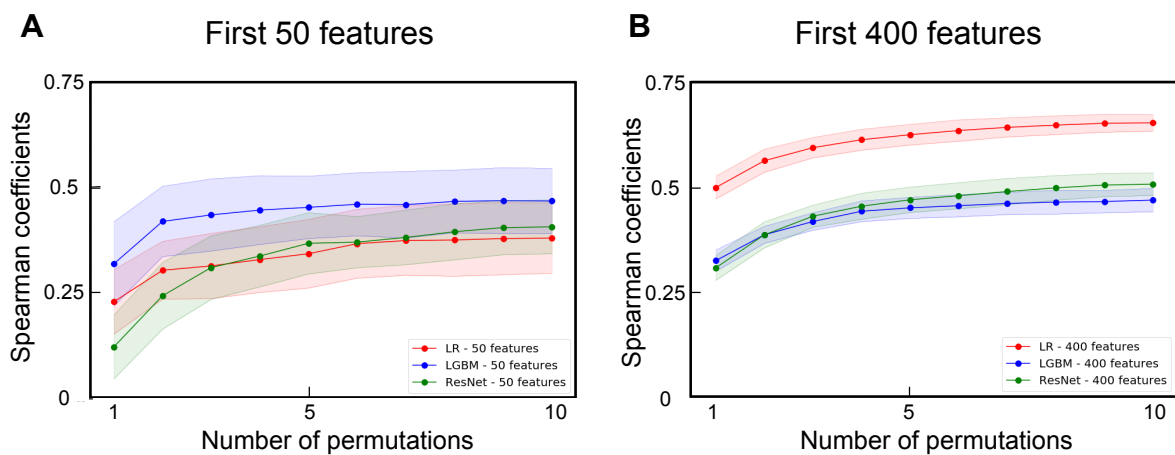

**Fig. S2. Permutation feature importance scores.**

We show the Spearman Rank test coefficient  $r_s$  respectively for the best 50 (panel A) and 400 (panel B) loci, as a function of the number  $N$  of permutations per feature. The features ranks are given after averaging over the  $N$  permutation feature importance scores. We show the results for logistic regression with Lasso regularization (LR), LightGBM (LGBM), and a dense residual neural network with 3 hidden layers (ResDN3). We consider the intersection between the same kind of models, when trained on two different subsets of the data. Solid lines represent the mean values, respectively over all the couples of subsets (10 subsets, for a total of 45 couples), while shaded regions represent the 1 standard deviation confidence intervals.

### Spearman rank Test

In the main text, we compared the stability of the feature importance scores for the different models under study, in terms of the robustness  $R$ . In Fig. S3 we show the same results in term of the Spearman rank test  $r_s$  coefficients, as a function of the first  $x$  best loci.

In Fig. S3A, for a given model, we computed  $r_s$  for the ranks given by the same criterion applied to two different subsets of training data. To compare the results for two different criteria when the same model is trained on a given subset of data, in Fig. S3B the  $r_s$  coefficients when comparing LR with PFI and weight, and LGBM with PFI and gain are shown.

In Fig. S3C we studied the consistency of the rankings given by two models (with given criterion) on the same subset of training data. Finally, in Fig. S3D we evaluated the consistency of combined models on couples of subsets of training data, as defined in the main text. All in all, the results shown are qualitatively the same of those of Fig. 5 in the main text, but on a different scale, indicating the interchangeability of robustness  $R$  and Spearman  $r_s$  coefficient as measures to estimate the consistency of the feature importance ranking.

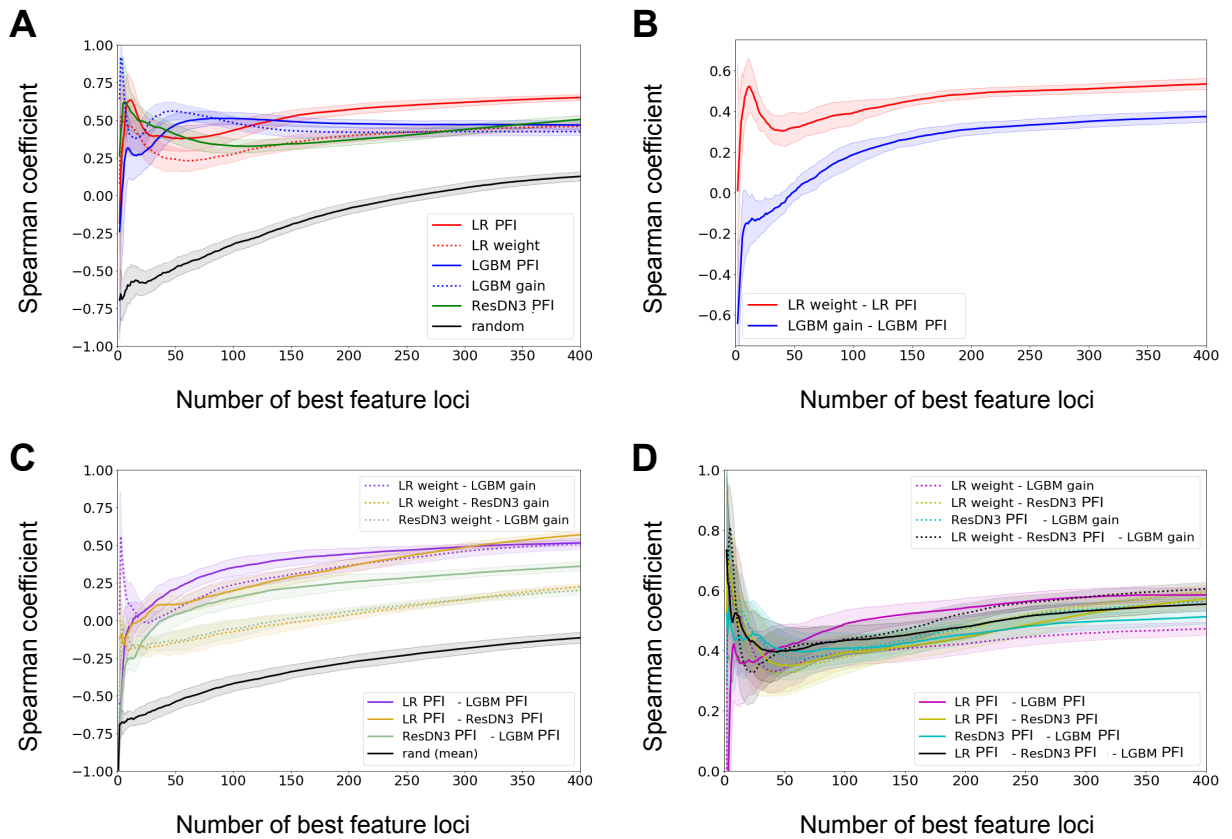

**Fig. S3. Comparison between permutation feature importance and other ranking scores.**

We show the Spearman Rank test coefficient  $r_s$  as a function of the first  $x$  best loci. In panel A we consider the robustness of a given model/criterion, when trained on two different subsets of the data. In panel B we show the robustness between the same model when two different criteria are considered on the same subset of the dataset. In panel C we compare two different models/criteria, on the same subset of the dataset. Finally in panel D we show the same analysis of panel A for combination of models.

Solid and dotted lines represent the mean values of the robustness distributions, respectively in panel A and D over all the couples of subsets (10 subsets, for a total of 45 couples), and in panel B and C over all the subsets (10 subsets, for a total of 10 couples). Shaded regions represent the 1 standard deviation confidence intervals.

We resumed the results given by the Spearman Rank Test for the 400 best loci in the heat-maps of Fig. S4. In particular, we separated the results given by different models but the same feature selection criterion (Fig. S4A), to mixed scenarios (Fig. S4B). Once again the results were very similar to those obtained in terms of robustness  $R$  in Fig. 3A.

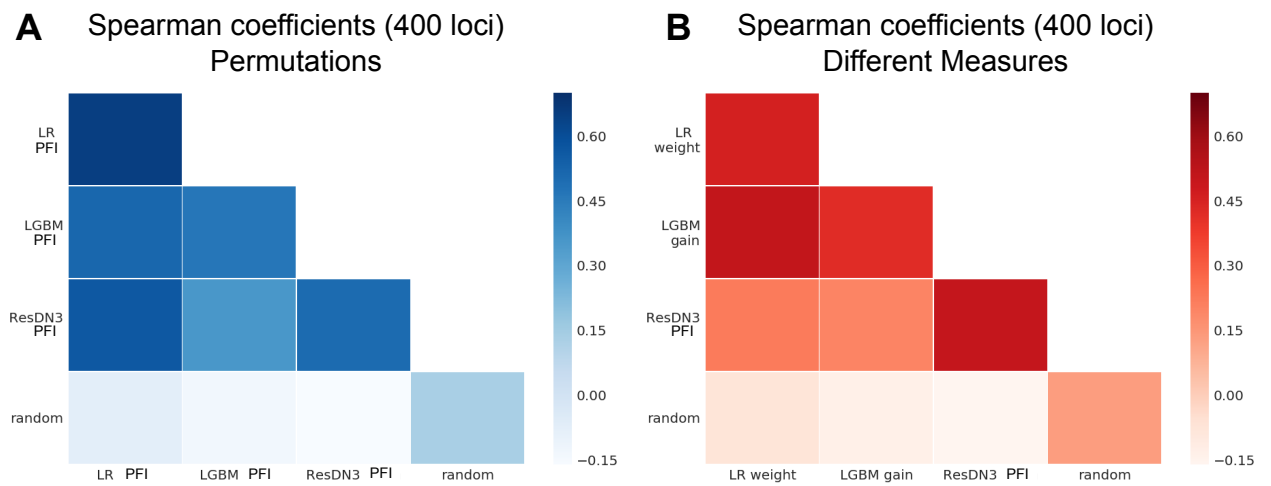

**Fig. S4. Spearman rank coefficient for lists of the 400 most important loci.**

We show the Spearman rank correlation coefficients for within- and between- models couples of lists of the 400 most important loci. On the diagonal are the results for the same model trained on two different subsets of the data (45 different couples of lists). Off-diagonal, are the results for two lists generated by two different models trained on the same subset of data (10 different couples of lists). Only mean results are shown. In the heat-map of panel A the same criterion (PFI) is used for all models, while in panel B we considered mixed scenarios.



| Order | LR weight       | LR PFI          | LGBM gain       | LGBM PFI        | ResDN3 PFI      |
|-------|-----------------|-----------------|-----------------|-----------------|-----------------|
| 1     | chr16, 50750kb  | chr16, 50750kb  | chr16, 50750kb  | chr7, 26750kb   | chr16, 50250kb  |
| 2     | chr5, 40250kb   | chr5, 40250kb   | chr1, 67750kb   | chr6, 31750kb   | chr16, 50750kb  |
| 3     | chr1, 67750kb   | chr7, 26750kb   | chr16, 50250kb  | chr6, 32750kb   | chr6, 32250kb   |
| 4     | chr7, 26750kb   | chr1, 67750kb   | chr2, 27750kb   | chr1, 67750kb   | chr2, 242750kb  |
| 5     | chr6, 31750kb   | chr6, 32250kb   | chr10, 101250kb | chr16, 50750kb  | chr5, 38750kb   |
| 6     | chr16, 50250kb  | chr10, 101250kb | chr10, 64250kb  | chr12, 57750kb  | chr20, 57750kb  |
| 7     | chr6, 32250kb   | chr5, 158750kb  | chr2, 25250kb   | chr16, 50250kb  | chr1, 67750kb   |
| 8     | chr10, 101250kb | chr16, 50250kb  | chr5, 40250kb   | chr5, 40250kb   | chr10, 101250kb |
| 9     | chr5, 150250kb  | chr6, 167250kb  | chr6, 31750kb   | chr8, 126750kb  | chr17, 25750kb  |
| 10    | chr5, 158750kb  | chr10, 35250kb  | chr12, 40750kb  | chr10, 101250kb | chr8, 129750kb  |
| 11    | chr22, 39250kb  | chr9, 117250kb  | chr10, 82250kb  | chr17, 40250kb  | chr21, 34750kb  |
| 12    | chr19, 10250kb  | chr17, 37750kb  | chr5, 38750kb   | chr5, 38750kb   | chr6, 167250kb  |
| 13    | chr6, 167250kb  | chr22, 39250kb  | chr3, 49750kb   | chr3, 18750kb   | chr14, 75750kb  |
| 14    | chr14, 75750kb  | chr2, 242750kb  | chr2, 242750kb  | chr10, 35250kb  | chr20, 42750kb  |
| 15    | chr10, 35250kb  | chr9, 4750kb    | chr9, 4750kb    | chr7, 51250kb   | chr7, 26750kb   |
| 16    | chr6, 32750kb   | chr6, 32750kb   | chr17, 25750kb  | chr5, 158750kb  | chr5, 55250kb   |
| 17    | chr13, 42750kb  | chr5, 38750kb   | chr6, 31250kb   | chr6, 167250kb  | chr6, 32750kb   |
| 18    | chr2, 242750kb  | chr4, 123250kb  | chr2, 234250kb  | chr2, 242750kb  | chr20, 62250kb  |
| 19    | chr4, 123250kb  | chr20, 62250kb  | chr11, 76250kb  | chr22, 39250kb  | chr10, 64250kb  |
| 20    | chr3, 18750kb   | chr16, 28750kb  | chr7, 26750kb   | chr1, 160750kb  | chr11, 65750kb  |
| 21    | chr8, 129750kb  | chr6, 31250kb   | chr5, 158750kb  | chr15, 38750kb  | chr5, 156250kb  |
| 22    | chr17, 37750kb  | chr11, 76250kb  | chr6, 106250kb  | chr8, 129750kb  | chr7, 50250kb   |
| 23    | chr10, 6250kb   | chr10, 64250kb  | chr20, 62250kb  | chr6, 30250kb   | chr13, 40750kb  |
| 24    | chr9, 117250kb  | chr14, 75750kb  | chr21, 34750kb  | chr9, 139250kb  | chr7, 100250kb  |
| 25    | chr11, 65750kb  | chr17, 25750kb  | chr14, 75750kb  | chr13, 42750kb  | chr16, 28750kb  |
| 26    | chr9, 4750kb    | chr9, 139250kb  | chr10, 35250kb  | chr5, 55250kb   | chr10, 94750kb  |
| 27    | chr12, 57750kb  | chr5, 131750kb  | chr6, 21250kb   | chr21, 34750kb  | chr5, 158750kb  |
| 28    | chr1, 1250kb    | chr5, 150250kb  | chr22, 39250kb  | chr10, 35750kb  | chr8, 27250kb   |
| 29    | chr5, 38750kb   | chr6, 31750kb   | chr19, 10250kb  | chr14, 75750kb  | chr12, 57750kb  |
| 30    | chr22, 30250kb  | chr20, 57750kb  | chr8, 129750kb  | chr17, 25750kb  | chr11, 134250kb |
| 31    | chr7, 98750kb   | chr2, 65750kb   | chr19, 49250kb  | chr4, 123250kb  | chr5, 71750kb   |
| 32    | chr20, 62250kb  | chr21, 34750kb  | chr6, 32750kb   | chr2, 103250kb  | chr15, 63750kb  |
| 33    | chr6, 31250kb   | chr6, 106250kb  | chr20, 57750kb  | chr10, 6250kb   | chr8, 79750kb   |
| 34    | chr2, 25250kb   | chr2, 25250kb   | chr19, 750kb    | chr20, 57750kb  | chr22, 37250kb  |
| 35    | chr13, 40750kb  | chr8, 129750kb  | chr16, 85750kb  | chr10, 64250kb  | chr9, 4750kb    |
| 36    | chr2, 103250kb  | chr13, 42750kb  | chr7, 98750kb   | chr17, 37750kb  | chr15, 38750kb  |
| 37    | chr20, 57750kb  | chr19, 750kb    | chr5, 55250kb   | chr16, 28750kb  | chr2, 25250kb   |
| 38    | chr9, 139250kb  | chr2, 103250kb  | chr7, 51250kb   | chr11, 65750kb  | chr10, 3750kb   |
| 39    | chr1, 197750kb  | chr1, 200750kb  | chr1, 78250kb   | chr10, 59750kb  | chr7, 98750kb   |
| 40    | chr2, 65750kb   | chr3, 49750kb   | chr11, 65750kb  | chr6, 32250kb   | chr6, 30250kb   |
| 41    | chr5, 55250kb   | chr16, 85750kb  | chr12, 6250kb   | chr2, 25250kb   | chr6, 106250kb  |
| 42    | chr16, 28750kb  | chr3, 18750kb   | chr6, 149250kb  | chr2, 65750kb   | chr11, 61750kb  |
| 43    | chr2, 61250kb   | chr12, 57750kb  | chr6, 167250kb  | chr1, 206750kb  | chr6, 31750kb   |
| 44    | chr17, 25750kb  | chr19, 34250kb  | chr9, 139250kb  | chr20, 62250kb  | chr1, 1250kb    |

| Order | LR weight       | LR PFI         | LGBM gain      | LGBM PFI        | ResDN3 PFI     |
|-------|-----------------|----------------|----------------|-----------------|----------------|
| 45    | chr6, 106250kb  | chr5, 141750kb | chr17, 40250kb | chr9, 4750kb    | chr19, 46750kb |
| 46    | chr1, 120250kb  | chr11, 65750kb | chr17, 54750kb | chr1, 1250kb    | chr1, 113250kb |
| 47    | chr1, 198750kb  | chr5, 55250kb  | chr2, 103250kb | chr7, 98750kb   | chr19, 34250kb |
| 48    | chr14, 64750kb  | chr6, 21250kb  | chr10, 6250kb  | chr11, 76250kb  | chr2, 65750kb  |
| 49    | chr2, 145250kb  | chr5, 40750kb  | chr10, 75750kb | chr7, 100250kb  | chr6, 21250kb  |
| 50    | chr17, 57750kb  | chr2, 61250kb  | chr1, 51250kb  | chr1, 161750kb  | chr4, 106250kb |
| 51    | chr11, 76250kb  | chr7, 100250kb | chr7, 50250kb  | chr5, 150250kb  | chr1, 226750kb |
| 52    | chr1, 206750kb  | chr2, 234250kb | chr10, 81250kb | chr2, 28250kb   | chr4, 123250kb |
| 53    | chr19, 750kb    | chr7, 50250kb  | chr6, 32250kb  | chr6, 21250kb   | chr18, 77250kb |
| 54    | chr13, 107750kb | chr1, 206750kb | chr19, 34250kb | chr9, 117250kb  | chr2, 27750kb  |
| 55    | chr19, 34250kb  | chr5, 156250kb | chr9, 117250kb | chr19, 10250kb  | chr5, 40250kb  |
| 56    | chr16, 85750kb  | chr2, 27750kb  | chr19, 33250kb | chr14, 88250kb  | chr4, 187250kb |
| 57    | chr7, 100250kb  | chr21, 16750kb | chr16, 11750kb | chr15, 67250kb  | chr2, 28750kb  |
| 58    | chr6, 105750kb  | chr19, 49250kb | chr1, 206750kb | chr2, 231250kb  | chr2, 61750kb  |
| 59    | chr10, 82250kb  | chr5, 71750kb  | chr13, 42750kb | chr13, 40750kb  | chr1, 51250kb  |
| 60    | chr2, 28250kb   | chr14, 88250kb | chr5, 131750kb | chr2, 234250kb  | chr11, 35250kb |
| 61    | chr10, 64250kb  | chr8, 126750kb | chr11, 64250kb | chr2, 145250kb  | chr19, 54750kb |
| 62    | chr5, 71750kb   | chr6, 30250kb  | chr7, 100250kb | chr12, 6250kb   | chr2, 201750kb |
| 63    | chr21, 34750kb  | chr13, 40750kb | chr1, 92750kb  | chr16, 11750kb  | chr1, 186750kb |
| 64    | chr11, 134250kb | chr1, 1250kb   | chr2, 28750kb  | chr17, 57750kb  | chr1, 206750kb |
| 65    | chr3, 25250kb   | chr10, 6250kb  | chr1, 160750kb | chr3, 49750kb   | chr2, 37250kb  |
| 66    | chr11, 33750kb  | chr10, 60250kb | chr17, 57750kb | chr11, 134250kb | chr5, 173250kb |
| 67    | chr5, 173250kb  | chr11, 60750kb | chr15, 67250kb | chr2, 27750kb   | chr22, 39250kb |
| 68    | chr8, 79750kb   | chr13, 44250kb | chr16, 28250kb | chr1, 186750kb  | chr6, 149250kb |
| 69    | chr21, 16750kb  | chr8, 27250kb  | chr2, 160750kb | chr5, 156250kb  | chr16, 11750kb |
| 70    | chr19, 33250kb  | chr20, 42750kb | chr17, 37750kb | chr7, 50250kb   | chr2, 28250kb  |
| 71    | chr18, 12750kb  | chr16, 11750kb | chr4, 123250kb | chr18, 12750kb  | chr1, 161750kb |
| 72    | chr6, 30250kb   | chr21, 45750kb | chr7, 148250kb | chr20, 42750kb  | chr9, 117250kb |
| 73    | chr12, 6250kb   | chr12, 6250kb  | chr10, 94250kb | chr10, 94750kb  | chr12, 6250kb  |
| 74    | chr3, 49750kb   | chr5, 173250kb | chr20, 42750kb | chr19, 750kb    | chr5, 131750kb |
| 75    | chr2, 62750kb   | chr21, 40750kb | chr2, 145250kb | chr1, 113250kb  | chr6, 20750kb  |
| 76    | chr15, 63750kb  | chr17, 40250kb | chr2, 28250kb  | chr11, 58250kb  | chr2, 61250kb  |
| 77    | chr19, 46750kb  | chr19, 10250kb | chr13, 44250kb | chr7, 148250kb  | chr6, 31250kb  |
| 78    | chr7, 28250kb   | chr2, 28250kb  | chr18, 12750kb | chr8, 91250kb   | chr5, 40750kb  |
| 79    | chr1, 113250kb  | chr7, 148250kb | chr3, 18750kb  | chr5, 131750kb  | chr4, 38750kb  |
| 80    | chr2, 37250kb   | chr6, 128250kb | chr3, 25250kb  | chr5, 71750kb   | chr9, 139250kb |
| 81    | chr8, 27250kb   | chr2, 145250kb | chr1, 197750kb | chr6, 149250kb  | chr1, 92750kb  |
| 82    | chr14, 35750kb  | chr15, 63750kb | chr11, 58250kb | chr19, 49250kb  | chr9, 113750kb |
| 83    | chr7, 72750kb   | chr5, 10750kb  | chr1, 1250kb   | chr15, 63750kb  | chr2, 22250kb  |
| 84    | chr1, 200750kb  | chr2, 62750kb  | chr8, 126750kb | chr16, 28250kb  | chr14, 54250kb |
| 85    | chr7, 50250kb   | chr8, 79750kb  | chr10, 59750kb | chr11, 60750kb  | chr2, 234250kb |
| 86    | chr5, 156250kb  | chr16, 11250kb | chr5, 71750kb  | chr5, 40750kb   | chr11, 58250kb |
| 87    | chr11, 60750kb  | chr1, 186750kb | chr13, 40750kb | chr19, 34250kb  | chr19, 33750kb |
| 88    | chr2, 201750kb  | chr6, 29750kb  | chr2, 24750kb  | chr5, 173250kb  | chr10, 6250kb  |

| Order | LR weight       | LR PFI          | LGBM gain       | LGBM PFI        | ResDN3 PFI     |
|-------|-----------------|-----------------|-----------------|-----------------|----------------|
| 89    | chr6, 21250kb   | chr2, 28750kb   | chr8, 91250kb   | chr12, 40750kb  | chr11, 96250kb |
| 90    | chr5, 40750kb   | chr10, 94250kb  | chr5, 40750kb   | chr21, 16750kb  | chr14, 96250kb |
| 91    | chr5, 141750kb  | chr15, 38750kb  | chr1, 161750kb  | chr10, 3750kb   | chr19, 37250kb |
| 92    | chr5, 10750kb   | chr22, 30250kb  | chr5, 10750kb   | chr3, 49250kb   | chr13, 44250kb |
| 93    | chr2, 234250kb  | chr1, 172750kb  | chr16, 28750kb  | chr3, 25250kb   | chr6, 29750kb  |
| 94    | chr16, 28250kb  | chr12, 40750kb  | chr11, 60750kb  | chr2, 37250kb   | chr10, 94250kb |
| 95    | chr2, 136750kb  | chr22, 37250kb  | chr5, 156250kb  | chr22, 41750kb  | chr4, 26250kb  |
| 96    | chr15, 38750kb  | chr2, 231250kb  | chr19, 46750kb  | chr10, 82250kb  | chr21, 16750kb |
| 97    | chr20, 42750kb  | chr1, 198750kb  | chr10, 94750kb  | chr11, 61750kb  | chr16, 10750kb |
| 98    | chr16, 11750kb  | chr2, 241750kb  | chr15, 38750kb  | chr2, 61250kb   | chr7, 51250kb  |
| 99    | chr1, 172750kb  | chr2, 201750kb  | chr21, 16750kb  | chr22, 30250kb  | chr4, 48250kb  |
| 100   | chr10, 94250kb  | chr11, 134250kb | chr4, 106250kb  | chr1, 51250kb   | chr8, 91250kb  |
| 101   | chr13, 53250kb  | chr12, 111750kb | chr22, 41750kb  | chr4, 106250kb  | chr19, 750kb   |
| 102   | chr12, 40750kb  | chr7, 98750kb   | chr1, 113250kb  | chr22, 37250kb  | chr17, 54750kb |
| 103   | chr6, 29750kb   | chr15, 67250kb  | chr22, 37250kb  | chr6, 128250kb  | chr11, 2250kb  |
| 104   | chr1, 186750kb  | chr10, 94750kb  | chr5, 62250kb   | chr7, 50750kb   | chr8, 126750kb |
| 105   | chr22, 37250kb  | chr1, 161250kb  | chr2, 62750kb   | chr2, 23750kb   | chr2, 241750kb |
| 106   | chr6, 90750kb   | chr1, 113250kb  | chr11, 61750kb  | chr7, 149250kb  | chr1, 160750kb |
| 107   | chr3, 49250kb   | chr18, 12750kb  | chr12, 750kb    | chr6, 106250kb  | chr12, 58250kb |
| 108   | chr11, 58250kb  | chr16, 28250kb  | chr5, 150250kb  | chr2, 136750kb  | chr16, 11250kb |
| 109   | chr4, 38750kb   | chr8, 91250kb   | chr1, 114250kb  | chr16, 85750kb  | chr15, 86250kb |
| 110   | chr11, 4250kb   | chr1, 51250kb   | chr18, 20250kb  | chr6, 31250kb   | chr16, 85750kb |
| 111   | chr5, 131750kb  | chr17, 54750kb  | chr11, 134250kb | chr11, 128250kb | chr6, 137250kb |
| 112   | chr15, 67250kb  | chr11, 4250kb   | chr7, 149250kb  | chr21, 45750kb  | chr7, 83250kb  |
| 113   | chr4, 3250kb    | chr14, 96250kb  | chr5, 173250kb  | chr13, 107750kb | chr19, 49250kb |
| 114   | chr16, 11250kb  | chr18, 77250kb  | chr11, 2250kb   | chr17, 54750kb  | chr1, 198750kb |
| 115   | chr18, 77250kb  | chr6, 30750kb   | chr1, 186750kb  | chr10, 94250kb  | chr1, 185250kb |
| 116   | chr10, 90250kb  | chr2, 37250kb   | chr2, 23750kb   | chr6, 105750kb  | chr1, 205250kb |
| 117   | chr2, 219250kb  | chr17, 57750kb  | chr7, 6750kb    | chr19, 33750kb  | chr2, 182750kb |
| 118   | chr4, 106250kb  | chr4, 106250kb  | chr2, 61250kb   | chr10, 102250kb | chr2, 102750kb |
| 119   | chr1, 92750kb   | chr10, 81250kb  | chr11, 69250kb  | chr14, 96250kb  | chr1, 78250kb  |
| 120   | chr2, 86750kb   | chr4, 38750kb   | chr19, 34750kb  | chr19, 33250kb  | chr11, 64250kb |
| 121   | chr12, 111750kb | chr19, 46750kb  | chr6, 137250kb  | chr1, 172750kb  | chr7, 27250kb  |
| 122   | chr12, 56250kb  | chr17, 32250kb  | chr17, 46250kb  | chr2, 28750kb   | chr8, 116750kb |
| 123   | chr10, 60250kb  | chr7, 28250kb   | chr12, 110750kb | chr9, 128750kb  | chr9, 5250kb   |
| 124   | chr7, 148250kb  | chr10, 59750kb  | chr15, 63750kb  | chr7, 72750kb   | chr7, 148250kb |
| 125   | chr11, 61750kb  | chr1, 67250kb   | chr6, 90750kb   | chr1, 78250kb   | chr11, 60750kb |
| 126   | chr6, 137250kb  | chr1, 120250kb  | chr15, 86250kb  | chr3, 169750kb  | chr3, 101250kb |
| 127   | chr10, 35750kb  | chr11, 64250kb  | chr2, 65750kb   | chr6, 134250kb  | chr17, 40250kb |
| 128   | chr8, 126750kb  | chr1, 197750kb  | chr10, 35750kb  | chr12, 68250kb  | chr2, 160750kb |
| 129   | chr2, 28750kb   | chr19, 33250kb  | chr19, 46250kb  | chr11, 4250kb   | chr20, 44750kb |
| 130   | chr10, 3750kb   | chr19, 37250kb  | chr2, 181750kb  | chr10, 30750kb  | chr14, 39250kb |
| 131   | chr10, 94750kb  | chr6, 90750kb   | chr22, 21750kb  | chr6, 20750kb   | chr16, 30750kb |
| 132   | chr2, 23750kb   | chr10, 82250kb  | chr14, 96250kb  | chr2, 86750kb   | chr1, 55250kb  |

| Order | LR weight       | LR PFI          | LGBM gain       | LGBM PFI        | ResDN3 PFI     |
|-------|-----------------|-----------------|-----------------|-----------------|----------------|
| 133   | chr17, 32250kb  | chr4, 103250kb  | chr19, 33750kb  | chr11, 69250kb  | chr1, 172750kb |
| 134   | chr14, 35250kb  | chr3, 25250kb   | chr10, 30750kb  | chr11, 2250kb   | chr5, 159750kb |
| 135   | chr14, 88250kb  | chr19, 18250kb  | chr1, 172750kb  | chr16, 75250kb  | chr10, 75750kb |
| 136   | chr2, 43250kb   | chr14, 35750kb  | chr8, 27250kb   | chr5, 10750kb   | chr11, 4250kb  |
| 137   | chr19, 33750kb  | chr2, 102750kb  | chr2, 102750kb  | chr12, 56750kb  | chr17, 57750kb |
| 138   | chr3, 33750kb   | chr10, 75750kb  | chr1, 151250kb  | chr3, 58750kb   | chr1, 12250kb  |
| 139   | chr11, 64250kb  | chr1, 160750kb  | chr19, 18250kb  | chr1, 197750kb  | chr1, 8250kb   |
| 140   | chr1, 21750kb   | chr1, 161750kb  | chr5, 176750kb  | chr6, 137250kb  | chr10, 35750kb |
| 141   | chr10, 30750kb  | chr10, 3750kb   | chr16, 14250kb  | chr2, 201750kb  | chr19, 18250kb |
| 142   | chr14, 98250kb  | chr6, 111750kb  | chr6, 6750kb    | chr14, 64750kb  | chr3, 169750kb |
| 143   | chr19, 49250kb  | chr11, 61750kb  | chr7, 17250kb   | chr2, 181750kb  | chr14, 64750kb |
| 144   | chr16, 75250kb  | chr6, 149250kb  | chr10, 3750kb   | chr16, 14250kb  | chr2, 67750kb  |
| 145   | chr12, 58250kb  | chr1, 151250kb  | chr2, 218750kb  | chr19, 46250kb  | chr6, 30750kb  |
| 146   | chr18, 56750kb  | chr11, 58250kb  | chr6, 3250kb    | chr15, 86250kb  | chr1, 231250kb |
| 147   | chr9, 115750kb  | chr3, 101250kb  | chr6, 159250kb  | chr11, 64250kb  | chr3, 46250kb  |
| 148   | chr6, 6750kb    | chr2, 23750kb   | chr11, 4250kb   | chr6, 143750kb  | chr10, 35250kb |
| 149   | chr6, 143750kb  | chr14, 64750kb  | chr12, 98250kb  | chr6, 29750kb   | chr3, 58750kb  |
| 150   | chr9, 113750kb  | chr19, 33750kb  | chr6, 20750kb   | chr1, 92750kb   | chr17, 37750kb |
| 151   | chr11, 128250kb | chr4, 48250kb   | chr11, 35250kb  | chr16, 11250kb  | chr21, 45750kb |
| 152   | chr17, 54750kb  | chr7, 107250kb  | chr16, 75250kb  | chr2, 22250kb   | chr8, 4250kb   |
| 153   | chr7, 99750kb   | chr22, 21750kb  | chr3, 93750kb   | chr11, 71250kb  | chr13, 42750kb |
| 154   | chr1, 8250kb    | chr6, 137250kb  | chr4, 26250kb   | chr6, 111750kb  | chr3, 49750kb  |
| 155   | chr6, 159250kb  | chr1, 8250kb    | chr6, 29750kb   | chr11, 33750kb  | chr10, 30750kb |
| 156   | chr8, 10750kb   | chr6, 20750kb   | chr4, 48250kb   | chr18, 77250kb  | chr16, 14250kb |
| 157   | chr6, 111750kb  | chr2, 43250kb   | chr13, 107750kb | chr7, 17250kb   | chr11, 76750kb |
| 158   | chr20, 12250kb  | chr9, 113750kb  | chr7, 72750kb   | chr2, 161750kb  | chr1, 151750kb |
| 159   | chr3, 48750kb   | chr9, 5250kb    | chr8, 116750kb  | chr18, 20250kb  | chr16, 28250kb |
| 160   | chr1, 51250kb   | chr4, 187250kb  | chr14, 64750kb  | chr4, 38750kb   | chr2, 204750kb |
| 161   | chr6, 20750kb   | chr10, 30750kb  | chr16, 11250kb  | chr5, 176750kb  | chr10, 82250kb |
| 162   | chr6, 138250kb  | chr11, 128250kb | chr14, 54250kb  | chr12, 110750kb | chr17, 59250kb |
| 163   | chr6, 30750kb   | chr1, 205250kb  | chr18, 56750kb  | chr8, 116750kb  | chr19, 34750kb |
| 164   | chr8, 91250kb   | chr11, 35250kb  | chr4, 3250kb    | chr19, 18250kb  | chr2, 231250kb |
| 165   | chr4, 122750kb  | chr6, 137750kb  | chr2, 201750kb  | chr1, 21750kb   | chr1, 67250kb  |
| 166   | chr2, 181750kb  | chr1, 114250kb  | chr9, 116250kb  | chr1, 161250kb  | chr1, 161250kb |
| 167   | chr14, 96250kb  | chr18, 56750kb  | chr2, 37250kb   | chr12, 94750kb  | chr11, 69250kb |
| 168   | chr13, 40250kb  | chr5, 96250kb   | chr11, 128250kb | chr8, 27250kb   | chr22, 30250kb |
| 169   | chr2, 231250kb  | chr7, 72750kb   | chr1, 21750kb   | chr17, 32250kb  | chr7, 74250kb  |
| 170   | chr10, 102250kb | chr12, 68250kb  | chr2, 111750kb  | chr2, 98250kb   | chr7, 6750kb   |
| 171   | chr19, 37250kb  | chr20, 44750kb  | chr11, 15750kb  | chr10, 90250kb  | chr2, 43750kb  |
| 172   | chr6, 137750kb  | chr10, 35750kb  | chr2, 174750kb  | chr19, 1250kb   | chr2, 100750kb |
| 173   | chr2, 241750kb  | chr4, 102750kb  | chr1, 226750kb  | chr10, 75750kb  | chr18, 12750kb |
| 174   | chr1, 161250kb  | chr19, 1250kb   | chr4, 102750kb  | chr18, 53250kb  | chr6, 134250kb |
| 175   | chr1, 205250kb  | chr2, 219250kb  | chr14, 67750kb  | chr4, 48250kb   | chr15, 93250kb |
| 176   | chr12, 110750kb | chr10, 64750kb  | chr20, 44750kb  | chr11, 35250kb  | chr7, 72750kb  |

| Order | LR weight       | LR PFI         | LGBM gain       | LGBM PFI       | ResDN3 PFI      |
|-------|-----------------|----------------|-----------------|----------------|-----------------|
| 177   | chr4, 187250kb  | chr16, 10750kb | chr18, 77250kb  | chr2, 203750kb | chr7, 20250kb   |
| 178   | chr16, 14250kb  | chr2, 136750kb | chr19, 1250kb   | chr2, 185750kb | chr1, 21750kb   |
| 179   | chr9, 128750kb  | chr1, 151750kb | chr1, 68250kb   | chr19, 37250kb | chr9, 116250kb  |
| 180   | chr21, 40750kb  | chr6, 143750kb | chr6, 111750kb  | chr1, 55250kb  | chr6, 111750kb  |
| 181   | chr1, 200250kb  | chr2, 97250kb  | chr1, 92250kb   | chr5, 159750kb | chr3, 48750kb   |
| 182   | chr6, 153750kb  | chr6, 250kb    | chr14, 69250kb  | chr1, 205250kb | chr15, 54750kb  |
| 183   | chr7, 6750kb    | chr18, 4750kb  | chr2, 231250kb  | chr2, 67750kb  | chr11, 76250kb  |
| 184   | chr1, 151750kb  | chr16, 4750kb  | chr1, 71250kb   | chr14, 67750kb | chr17, 46250kb  |
| 185   | chr6, 19250kb   | chr12, 58250kb | chr16, 27250kb  | chr2, 111750kb | chr1, 201250kb  |
| 186   | chr13, 44250kb  | chr6, 138250kb | chr16, 31250kb  | chr6, 250kb    | chr2, 174750kb  |
| 187   | chr12, 111250kb | chr11, 2250kb  | chr14, 32250kb  | chr2, 102750kb | chr6, 143750kb  |
| 188   | chr11, 35250kb  | chr2, 22250kb  | chr22, 41250kb  | chr17, 46250kb | chr17, 40750kb  |
| 189   | chr1, 161750kb  | chr16, 14250kb | chr7, 83250kb   | chr1, 200750kb | chr1, 242750kb  |
| 190   | chr6, 149250kb  | chr18, 53250kb | chr13, 40250kb  | chr13, 44250kb | chr8, 57250kb   |
| 191   | chr15, 41250kb  | chr1, 185250kb | chr10, 90250kb  | chr10, 81250kb | chr15, 67250kb  |
| 192   | chr4, 26250kb   | chr5, 176750kb | chr5, 141750kb  | chr1, 226750kb | chr12, 40750kb  |
| 193   | chr10, 6750kb   | chr5, 72750kb  | chr12, 56750kb  | chr4, 100250kb | chr2, 97250kb   |
| 194   | chr17, 40250kb  | chr11, 96250kb | chr22, 30250kb  | chr19, 34750kb | chr10, 81250kb  |
| 195   | chr1, 12250kb   | chr5, 159750kb | chr12, 68250kb  | chr5, 141750kb | chr7, 56750kb   |
| 196   | chr2, 191750kb  | chr17, 46250kb | chr12, 40250kb  | chr1, 151250kb | chr9, 34250kb   |
| 197   | chr17, 32750kb  | chr2, 67750kb  | chr11, 33750kb  | chr7, 6750kb   | chr22, 41750kb  |
| 198   | chr4, 103250kb  | chr14, 98250kb | chr10, 6750kb   | chr12, 750kb   | chr11, 128250kb |
| 199   | chr22, 21750kb  | chr11, 33750kb | chr2, 43750kb   | chr12, 56250kb | chr18, 4750kb   |
| 200   | chr1, 185250kb  | chr2, 86750kb  | chr15, 93250kb  | chr7, 74250kb  | chr19, 1250kb   |
| 201   | chr8, 116750kb  | chr4, 26250kb  | chr17, 32750kb  | chr21, 40750kb | chr14, 69250kb  |
| 202   | chr10, 59750kb  | chr15, 86250kb | chr11, 96250kb  | chr8, 79750kb  | chr9, 128750kb  |
| 203   | chr7, 74250kb   | chr18, 46250kb | chr4, 38750kb   | chr22, 21750kb | chr1, 11750kb   |
| 204   | chr12, 107250kb | chr6, 134250kb | chr6, 128250kb  | chr6, 159250kb | chr6, 250kb     |
| 205   | chr3, 169750kb  | chr3, 48750kb  | chr18, 47250kb  | chr1, 67250kb  | chr17, 32250kb  |
| 206   | chr15, 86250kb  | chr1, 92750kb  | chr16, 4250kb   | chr1, 151750kb | chr20, 47250kb  |
| 207   | chr18, 4750kb   | chr1, 226750kb | chr3, 169750kb  | chr2, 186250kb | chr18, 53250kb  |
| 208   | chr7, 149250kb  | chr7, 6750kb   | chr1, 120250kb  | chr11, 96250kb | chr2, 145250kb  |
| 209   | chr7, 56750kb   | chr13, 40250kb | chr2, 86750kb   | chr1, 198750kb | chr16, 4750kb   |
| 210   | chr19, 18250kb  | chr20, 43250kb | chr6, 30250kb   | chr9, 34250kb  | chr5, 171750kb  |
| 211   | chr7, 83250kb   | chr3, 58750kb  | chr9, 34250kb   | chr7, 28250kb  | chr7, 17250kb   |
| 212   | chr2, 97250kb   | chr12, 68750kb | chr2, 163250kb  | chr6, 137750kb | chr3, 159750kb  |
| 213   | chr2, 111750kb  | chr7, 17250kb  | chr10, 125750kb | chr1, 231250kb | chr7, 149250kb  |
| 214   | chr2, 19250kb   | chr10, 6750kb  | chr2, 191250kb  | chr8, 10750kb  | chr10, 50250kb  |
| 215   | chr3, 101250kb  | chr1, 12250kb  | chr6, 134250kb  | chr8, 129250kb | chr6, 138250kb  |
| 216   | chr1, 78250kb   | chr2, 43750kb  | chr5, 95250kb   | chr1, 200250kb | chr1, 66750kb   |
| 217   | chr21, 45750kb  | chr14, 54250kb | chr13, 53250kb  | chr4, 103250kb | chr1, 197750kb  |
| 218   | chr18, 20250kb  | chr2, 160750kb | chr5, 39750kb   | chr14, 98250kb | chr13, 113750kb |
| 219   | chr16, 87750kb  | chr1, 21750kb  | chr6, 138250kb  | chr13, 53250kb | chr1, 200750kb  |
| 220   | chr8, 118750kb  | chr1, 173250kb | chr11, 71250kb  | chr7, 107250kb | chr2, 111750kb  |

| Order | LR weight       | LR PFI          | LGBM gain       | LGBM PFI        | ResDN3 PFI      |
|-------|-----------------|-----------------|-----------------|-----------------|-----------------|
| 221   | chr1, 151250kb  | chr8, 4250kb    | chr5, 171750kb  | chr6, 30750kb   | chr2, 62750kb   |
| 222   | chr10, 129250kb | chr8, 116750kb  | chr10, 114750kb | chr14, 35250kb  | chr19, 55250kb  |
| 223   | chr1, 67250kb   | chr8, 10750kb   | chr11, 85750kb  | chr16, 4750kb   | chr2, 68750kb   |
| 224   | chr2, 27750kb   | chr6, 159250kb  | chr15, 26750kb  | chr1, 114250kb  | chr2, 23750kb   |
| 225   | chr13, 24750kb  | chr2, 111750kb  | chr12, 56250kb  | chr4, 122750kb  | chr13, 40250kb  |
| 226   | chr11, 2250kb   | chr14, 39250kb  | chr7, 107250kb  | chr4, 187250kb  | chr9, 123750kb  |
| 227   | chr1, 68250kb   | chr6, 33250kb   | chr12, 94750kb  | chr2, 236750kb  | chr14, 98250kb  |
| 228   | chr22, 41750kb  | chr18, 20250kb  | chr3, 49250kb   | chr11, 118750kb | chr2, 181750kb  |
| 229   | chr10, 75750kb  | chr7, 51250kb   | chr6, 143750kb  | chr6, 90750kb   | chr1, 7750kb    |
| 230   | chr5, 62250kb   | chr3, 169750kb  | chr1, 200750kb  | chr4, 38250kb   | chr10, 64750kb  |
| 231   | chr11, 96250kb  | chr22, 41750kb  | chr3, 38750kb   | chr10, 6750kb   | chr2, 60750kb   |
| 232   | chr3, 58750kb   | chr21, 40250kb  | chr19, 37250kb  | chr10, 60250kb  | chr19, 10250kb  |
| 233   | chr1, 7750kb    | chr19, 54750kb  | chr1, 168750kb  | chr18, 4750kb   | chr8, 135750kb  |
| 234   | chr11, 69250kb  | chr7, 83250kb   | chr2, 136750kb  | chr19, 46750kb  | chr6, 34750kb   |
| 235   | chr18, 46250kb  | chr1, 231250kb  | chr1, 198750kb  | chr8, 97250kb   | chr6, 128250kb  |
| 236   | chr18, 67750kb  | chr10, 102250kb | chr16, 87750kb  | chr9, 16750kb   | chr3, 103750kb  |
| 237   | chr1, 114250kb  | chr16, 75250kb  | chr6, 250kb     | chr4, 3250kb    | chr18, 67750kb  |
| 238   | chr3, 33250kb   | chr9, 34250kb   | chr1, 55250kb   | chr8, 118750kb  | chr5, 150250kb  |
| 239   | chr8, 4250kb    | chr14, 67750kb  | chr2, 67750kb   | chr1, 71250kb   | chr4, 103250kb  |
| 240   | chr1, 168750kb  | chr1, 55250kb   | chr4, 100250kb  | chr8, 135750kb  | chr10, 125750kb |
| 241   | chr9, 5250kb    | chr9, 128750kb  | chr2, 127250kb  | chr16, 4250kb   | chr5, 96250kb   |
| 242   | chr4, 48250kb   | chr1, 68250kb   | chr16, 4750kb   | chr4, 102750kb  | chr12, 40250kb  |
| 243   | chr11, 116250kb | chr2, 181750kb  | chr6, 137750kb  | chr16, 79750kb  | chr6, 137750kb  |
| 244   | chr12, 98250kb  | chr10, 90250kb  | chr6, 160250kb  | chr20, 12250kb  | chr10, 81750kb  |
| 245   | chr1, 92250kb   | chr1, 78250kb   | chr17, 68250kb  | chr9, 115750kb  | chr1, 36750kb   |
| 246   | chr16, 4750kb   | chr17, 40750kb  | chr12, 113250kb | chr2, 232750kb  | chr6, 151750kb  |
| 247   | chr12, 68250kb  | chr7, 99750kb   | chr4, 103250kb  | chr6, 3250kb    | chr10, 90250kb  |
| 248   | chr1, 207750kb  | chr11, 69250kb  | chr22, 36750kb  | chr18, 67750kb  | chr21, 43750kb  |
| 249   | chr2, 70250kb   | chr6, 139750kb  | chr12, 9250kb   | chr11, 85750kb  | chr6, 3250kb    |
| 250   | chr10, 125750kb | chr18, 67750kb  | chr16, 49750kb  | chr12, 115250kb | chr3, 25250kb   |
| 251   | chr5, 95250kb   | chr3, 33750kb   | chr3, 101250kb  | chr5, 171750kb  | chr4, 102750kb  |
| 252   | chr16, 6250kb   | chr6, 34750kb   | chr1, 231250kb  | chr14, 35750kb  | chr5, 95250kb   |
| 253   | chr9, 4250kb    | chr7, 149250kb  | chr9, 107250kb  | chr2, 43750kb   | chr2, 62250kb   |
| 254   | chr1, 226750kb  | chr2, 203750kb  | chr8, 135750kb  | chr20, 44750kb  | chr3, 119250kb  |
| 255   | chr6, 33250kb   | chr2, 163250kb  | chr7, 74250kb   | chr9, 116250kb  | chr3, 167750kb  |
| 256   | chr3, 119250kb  | chr11, 118750kb | chr12, 111250kb | chr22, 41250kb  | chr18, 46250kb  |
| 257   | chr4, 38250kb   | chr12, 9250kb   | chr1, 110250kb  | chr1, 35250kb   | chr5, 79750kb   |
| 258   | chr5, 159750kb  | chr8, 113250kb  | chr2, 67250kb   | chr17, 32750kb  | chr8, 10750kb   |
| 259   | chr2, 127250kb  | chr4, 3250kb    | chr12, 57750kb  | chr5, 95250kb   | chr12, 111250kb |
| 260   | chr16, 10750kb  | chr6, 3250kb    | chr9, 128750kb  | chr2, 174750kb  | chr1, 114250kb  |
| 261   | chr10, 114750kb | chr5, 111250kb  | chr1, 155250kb  | chr1, 68250kb   | chr5, 10750kb   |
| 262   | chr19, 1250kb   | chr8, 23250kb   | chr1, 161250kb  | chr20, 10750kb  | chr1, 168750kb  |
| 263   | chr16, 79750kb  | chr7, 74250kb   | chr5, 137750kb  | chr6, 139750kb  | chr2, 136750kb  |
| 264   | chr4, 102750kb  | chr11, 10750kb  | chr6, 139750kb  | chr6, 138250kb  | chr5, 111250kb  |

| Order | LR weight      | LR PFI          | LGBM gain       | LGBM PFI        | ResDN3 PFI      |
|-------|----------------|-----------------|-----------------|-----------------|-----------------|
| 265   | chr8, 129250kb | chr7, 123250kb  | chr16, 79750kb  | chr7, 83250kb   | chr10, 60250kb  |
| 266   | chr1, 55250kb  | chr2, 204750kb  | chr7, 56750kb   | chr15, 93250kb  | chr19, 46250kb  |
| 267   | chr2, 98250kb  | chr13, 107750kb | chr11, 63750kb  | chr13, 43250kb  | chr10, 102250kb |
| 268   | chr17, 46250kb | chr3, 33250kb   | chr5, 72250kb   | chr8, 57250kb   | chr20, 23750kb  |
| 269   | chr19, 18750kb | chr12, 56750kb  | chr14, 30750kb  | chr3, 33750kb   | chr5, 750kb     |
| 270   | chr6, 34250kb  | chr3, 50750kb   | chr6, 33250kb   | chr2, 241750kb  | chr2, 98250kb   |
| 271   | chr18, 39750kb | chr20, 47250kb  | chr21, 40250kb  | chr16, 86250kb  | chr18, 48250kb  |
| 272   | chr2, 232750kb | chr6, 20250kb   | chr16, 10750kb  | chr4, 26250kb   | chr10, 6750kb   |
| 273   | chr2, 43750kb  | chr9, 116250kb  | chr14, 88250kb  | chr2, 62750kb   | chr4, 77750kb   |
| 274   | chr8, 23250kb  | chr8, 129250kb  | chr7, 102250kb  | chr2, 219250kb  | chr16, 6250kb   |
| 275   | chr1, 155250kb | chr7, 81750kb   | chr2, 182750kb  | chr14, 32250kb  | chr2, 237750kb  |
| 276   | chr10, 81750kb | chr6, 29250kb   | chr19, 55250kb  | chr21, 40250kb  | chr8, 23250kb   |
| 277   | chr14, 54250kb | chr6, 105750kb  | chr1, 25250kb   | chr5, 105750kb  | chr2, 43250kb   |
| 278   | chr8, 57250kb  | chr7, 56750kb   | chr15, 50250kb  | chr6, 160250kb  | chr2, 219250kb  |
| 279   | chr4, 77750kb  | chr19, 46250kb  | chr1, 151750kb  | chr9, 113750kb  | chr5, 176750kb  |
| 280   | chr5, 96250kb  | chr5, 35750kb   | chr4, 187250kb  | chr13, 40250kb  | chr3, 50250kb   |
| 281   | chr5, 111250kb | chr2, 98250kb   | chr2, 33250kb   | chr7, 128750kb  | chr5, 72750kb   |
| 282   | chr5, 75750kb  | chr1, 7750kb    | chr18, 39750kb  | chr5, 72250kb   | chr11, 33750kb  |
| 283   | chr18, 72250kb | chr14, 69250kb  | chr7, 20250kb   | chr12, 111250kb | chr18, 39750kb  |
| 284   | chr14, 67750kb | chr12, 107250kb | chr2, 22250kb   | chr19, 55250kb  | chr17, 75750kb  |
| 285   | chr12, 56750kb | chr4, 77750kb   | chr18, 33250kb  | chr11, 16250kb  | chr2, 203750kb  |
| 286   | chr17, 72750kb | chr3, 167750kb  | chr1, 67250kb   | chr16, 31250kb  | chr6, 20250kb   |
| 287   | chr6, 128250kb | chr2, 182750kb  | chr20, 12250kb  | chr1, 155250kb  | chr16, 31250kb  |
| 288   | chr1, 2250kb   | chr7, 20250kb   | chr7, 28250kb   | chr1, 92250kb   | chr19, 33250kb  |
| 289   | chr1, 110250kb | chr12, 56250kb  | chr2, 236750kb  | chr6, 165750kb  | chr14, 67750kb  |
| 290   | chr2, 24750kb  | chr1, 207750kb  | chr12, 68750kb  | chr17, 68250kb  | chr19, 57250kb  |
| 291   | chr14, 69250kb | chr9, 115750kb  | chr21, 45750kb  | chr2, 182750kb  | chr13, 44750kb  |
| 292   | chr18, 48250kb | chr1, 2250kb    | chr10, 64750kb  | chr2, 97250kb   | chr7, 107250kb  |
| 293   | chr1, 231250kb | chr6, 127750kb  | chr2, 203750kb  | chr14, 69250kb  | chr5, 141250kb  |
| 294   | chr2, 46250kb  | chr8, 130750kb  | chr7, 81750kb   | chr20, 47250kb  | chr17, 72750kb  |
| 295   | chr22, 45250kb | chr11, 85750kb  | chr4, 115250kb  | chr3, 48750kb   | chr11, 15750kb  |
| 296   | chr5, 87750kb  | chr3, 103750kb  | chr1, 185250kb  | chr3, 10250kb   | chr8, 113250kb  |
| 297   | chr3, 38750kb  | chr15, 93250kb  | chr8, 4250kb    | chr16, 10750kb  | chr3, 33750kb   |
| 298   | chr14, 81250kb | chr9, 135750kb  | chr1, 22250kb   | chr19, 54750kb  | chr14, 88250kb  |
| 299   | chr5, 143250kb | chr3, 46250kb   | chr20, 47250kb  | chr17, 40750kb  | chr6, 33250kb   |
| 300   | chr2, 67750kb  | chr13, 44750kb  | chr4, 122750kb  | chr2, 62250kb   | chr2, 86750kb   |
| 301   | chr10, 81250kb | chr5, 137750kb  | chr17, 32250kb  | chr2, 43250kb   | chr11, 115250kb |
| 302   | chr5, 176750kb | chr13, 24750kb  | chr6, 34750kb   | chr6, 127750kb  | chr12, 9250kb   |
| 303   | chr9, 123750kb | chr19, 55250kb  | chr13, 44750kb  | chr9, 5250kb    | chr2, 162750kb  |
| 304   | chr2, 163250kb | chr7, 27250kb   | chr14, 35750kb  | chr19, 18750kb  | chr18, 20250kb  |
| 305   | chr2, 33250kb  | chr6, 6750kb    | chr2, 61750kb   | chr12, 9250kb   | chr1, 207250kb  |
| 306   | chr1, 214750kb | chr1, 214750kb  | chr16, 87250kb  | chr10, 125750kb | chr10, 80250kb  |
| 307   | chr1, 160750kb | chr16, 79750kb  | chr11, 118750kb | chr1, 160250kb  | chr14, 55250kb  |
| 308   | chr6, 139750kb | chr3, 113750kb  | chr18, 46250kb  | chr16, 87750kb  | chr8, 130750kb  |

| Order | LR weight       | LR PFI          | LGBM gain       | LGBM PFI        | ResDN3 PFI      |
|-------|-----------------|-----------------|-----------------|-----------------|-----------------|
| 309   | chr2, 22250kb   | chr2, 24750kb   | chr6, 33750kb   | chr5, 96250kb   | chr13, 43250kb  |
| 310   | chr20, 47250kb  | chr10, 125750kb | chr5, 130250kb  | chr5, 72750kb   | chr6, 159250kb  |
| 311   | chr3, 103750kb  | chr16, 4250kb   | chr7, 157250kb  | chr2, 70250kb   | chr2, 103250kb  |
| 312   | chr16, 86250kb  | chr1, 155250kb  | chr14, 98250kb  | chr1, 8250kb    | chr2, 102250kb  |
| 313   | chr3, 50750kb   | chr4, 122750kb  | chr8, 129250kb  | chr9, 123250kb  | chr5, 35750kb   |
| 314   | chr14, 30750kb  | chr1, 71250kb   | chr4, 90250kb   | chr20, 43250kb  | chr16, 86250kb  |
| 315   | chr2, 191250kb  | chr6, 34250kb   | chr6, 105750kb  | chr6, 35250kb   | chr16, 87250kb  |
| 316   | chr5, 137750kb  | chr13, 53250kb  | chr5, 750kb     | chr8, 143750kb  | chr3, 23250kb   |
| 317   | chr7, 17250kb   | chr14, 35250kb  | chr3, 33750kb   | chr20, 60250kb  | chr4, 3250kb    |
| 318   | chr7, 128750kb  | chr4, 38250kb   | chr18, 67750kb  | chr14, 54250kb  | chr9, 123250kb  |
| 319   | chr1, 71250kb   | chr5, 171750kb  | chr19, 10750kb  | chr7, 99750kb   | chr9, 95250kb   |
| 320   | chr3, 113750kb  | chr11, 116250kb | chr9, 113750kb  | chr20, 3750kb   | chr1, 120250kb  |
| 321   | chr11, 118750kb | chr1, 92250kb   | chr6, 165750kb  | chr2, 160750kb  | chr7, 28250kb   |
| 322   | chr1, 173250kb  | chr2, 19250kb   | chr6, 43250kb   | chr17, 72750kb  | chr15, 63250kb  |
| 323   | chr16, 30750kb  | chr6, 151750kb  | chr6, 127750kb  | chr1, 173250kb  | chr10, 54750kb  |
| 324   | chr6, 134250kb  | chr18, 48250kb  | chr14, 55250kb  | chr3, 122250kb  | chr12, 68250kb  |
| 325   | chr9, 34250kb   | chr18, 39750kb  | chr3, 122250kb  | chr12, 68750kb  | chr1, 214750kb  |
| 326   | chr1, 192250kb  | chr1, 168750kb  | chr16, 86250kb  | chr15, 41750kb  | chr19, 18750kb  |
| 327   | chr18, 68750kb  | chr2, 127250kb  | chr1, 12250kb   | chr12, 48250kb  | chr4, 38250kb   |
| 328   | chr1, 25250kb   | chr2, 174750kb  | chr11, 16250kb  | chr16, 27250kb  | chr10, 62250kb  |
| 329   | chr14, 39250kb  | chr12, 111250kb | chr8, 118750kb  | chr22, 45750kb  | chr1, 110250kb  |
| 330   | chr2, 203750kb  | chr20, 14250kb  | chr4, 8750kb    | chr14, 81250kb  | chr21, 40250kb  |
| 331   | chr21, 43750kb  | chr15, 54750kb  | chr10, 31250kb  | chr6, 34750kb   | chr2, 127250kb  |
| 332   | chr16, 9750kb   | chr21, 43750kb  | chr1, 120750kb  | chr10, 114750kb | chr1, 71250kb   |
| 333   | chr2, 174750kb  | chr7, 22750kb   | chr12, 115250kb | chr18, 56750kb  | chr2, 19250kb   |
| 334   | chr16, 68750kb  | chr16, 86250kb  | chr5, 143250kb  | chr21, 43750kb  | chr9, 34750kb   |
| 335   | chr6, 65750kb   | chr3, 119250kb  | chr9, 16750kb   | chr5, 141250kb  | chr12, 8750kb   |
| 336   | chr10, 80250kb  | chr2, 186250kb  | chr8, 23250kb   | chr1, 66750kb   | chr3, 118250kb  |
| 337   | chr19, 54750kb  | chr16, 6250kb   | chr4, 190750kb  | chr5, 39750kb   | chr12, 111750kb |
| 338   | chr16, 77250kb  | chr10, 114750kb | chr2, 211750kb  | chr10, 97250kb  | chr18, 56750kb  |
| 339   | chr7, 107250kb  | chr5, 95250kb   | chr2, 219250kb  | chr6, 6750kb    | chr1, 2250kb    |
| 340   | chr16, 87250kb  | chr16, 30750kb  | chr5, 105750kb  | chr1, 20250kb   | chr22, 45250kb  |
| 341   | chr9, 80250kb   | chr19, 18750kb  | chr1, 205250kb  | chr5, 11750kb   | chr17, 68250kb  |
| 342   | chr9, 116250kb  | chr9, 123750kb  | chr21, 40750kb  | chr10, 31250kb  | chr5, 105750kb  |
| 343   | chr7, 81750kb   | chr8, 135750kb  | chr16, 9750kb   | chr15, 30750kb  | chr8, 143750kb  |
| 344   | chr8, 130750kb  | chr6, 153750kb  | chr12, 48250kb  | chr6, 33250kb   | chr6, 29250kb   |
| 345   | chr6, 127750kb  | chr20, 19750kb  | chr3, 171750kb  | chr1, 7750kb    | chr6, 6750kb    |
| 346   | chr20, 43250kb  | chr1, 201250kb  | chr5, 72750kb   | chr9, 135750kb  | chr12, 56750kb  |
| 347   | chr18, 53250kb  | chr5, 39750kb   | chr12, 58250kb  | chr13, 44750kb  | chr3, 188750kb  |
| 348   | chr3, 10250kb   | chr2, 61750kb   | chr7, 128750kb  | chr4, 184750kb  | chr1, 173250kb  |
| 349   | chr3, 95750kb   | chr3, 118250kb  | chr18, 21750kb  | chr1, 168750kb  | chr16, 27250kb  |
| 350   | chr5, 105750kb  | chr10, 80250kb  | chr8, 97250kb   | chr5, 8250kb    | chr5, 143250kb  |
| 351   | chr20, 19750kb  | chr1, 110250kb  | chr19, 18750kb  | chr2, 100750kb  | chr1, 1750kb    |
| 352   | chr1, 201250kb  | chr22, 45250kb  | chr18, 53250kb  | chr20, 1250kb   | chr7, 123250kb  |



| Order | LR weight      | LR PFI          | LGBM gain       | LGBM PFI        | ResDN3 PFI      |
|-------|----------------|-----------------|-----------------|-----------------|-----------------|
| 353   | chr2, 102750kb | chr1, 155750kb  | chr9, 115750kb  | chr1, 101750kb  | chr20, 12250kb  |
| 354   | chr3, 188750kb | chr9, 4250kb    | chr2, 237750kb  | chr16, 30750kb  | chr16, 79750kb  |
| 355   | chr3, 167750kb | chr1, 1750kb    | chr1, 114750kb  | chr3, 38750kb   | chr18, 62250kb  |
| 356   | chr15, 63250kb | chr16, 87250kb  | chr18, 72250kb  | chr1, 27250kb   | chr6, 27250kb   |
| 357   | chr10, 64750kb | chr17, 75750kb  | chr4, 55750kb   | chr20, 1750kb   | chr6, 11250kb   |
| 358   | chr7, 123250kb | chr6, 165750kb  | chr1, 38250kb   | chr4, 25250kb   | chr1, 59250kb   |
| 359   | chr16, 4250kb  | chr16, 27250kb  | chr16, 6250kb   | chr2, 19250kb   | chr16, 68250kb  |
| 360   | chr14, 32250kb | chr18, 72250kb  | chr11, 4750kb   | chr9, 107250kb  | chr3, 122250kb  |
| 361   | chr20, 36750kb | chr20, 12250kb  | chr14, 92750kb  | chr1, 207250kb  | chr17, 45750kb  |
| 362   | chr3, 118250kb | chr5, 75750kb   | chr6, 65750kb   | chr12, 111750kb | chr15, 95750kb  |
| 363   | chr6, 34750kb  | chr14, 30750kb  | chr17, 45750kb  | chr5, 130250kb  | chr11, 85750kb  |
| 364   | chr7, 102250kb | chr1, 11750kb   | chr5, 111250kb  | chr10, 50250kb  | chr2, 228750kb  |
| 365   | chr2, 138250kb | chr1, 207250kb  | chr5, 35750kb   | chr20, 54250kb  | chr6, 28250kb   |
| 366   | chr15, 93250kb | chr3, 49250kb   | chr4, 38250kb   | chr2, 24750kb   | chr5, 7750kb    |
| 367   | chr12, 62250kb | chr17, 45750kb  | chr5, 9750kb    | chr7, 22750kb   | chr1, 80750kb   |
| 368   | chr9, 95250kb  | chr1, 101750kb  | chr4, 123750kb  | chr1, 185250kb  | chr10, 114750kb |
| 369   | chr8, 97250kb  | chr8, 143750kb  | chr11, 117750kb | chr1, 117250kb  | chr20, 6250kb   |
| 370   | chr6, 33750kb  | chr16, 68750kb  | chr20, 10750kb  | chr17, 45750kb  | chr6, 105750kb  |
| 371   | chr5, 11750kb  | chr1, 36750kb   | chr8, 75250kb   | chr12, 58250kb  | chr10, 59750kb  |
| 372   | chr3, 38250kb  | chr5, 750kb     | chr5, 96250kb   | chr2, 67250kb   | chr7, 99750kb   |
| 373   | chr15, 26750kb | chr12, 98250kb  | chr1, 11750kb   | chr5, 750kb     | chr2, 185750kb  |
| 374   | chr9, 75250kb  | chr1, 17750kb   | chr6, 23250kb   | chr5, 137750kb  | chr11, 116250kb |
| 375   | chr8, 135750kb | chr9, 123250kb  | chr14, 39250kb  | chr2, 163250kb  | chr6, 127750kb  |
| 376   | chr2, 61750kb  | chr3, 188750kb  | chr5, 87750kb   | chr20, 23750kb  | chr11, 118750kb |
| 377   | chr6, 160250kb | chr3, 122250kb  | chr2, 70250kb   | chr6, 34250kb   | chr21, 40750kb  |
| 378   | chr2, 228750kb | chr8, 57250kb   | chr1, 212250kb  | chr15, 90250kb  | chr9, 21750kb   |
| 379   | chr5, 8250kb   | chr10, 62250kb  | chr4, 80750kb   | chr1, 25250kb   | chr1, 68250kb   |
| 380   | chr5, 45250kb  | chr16, 87750kb  | chr1, 66750kb   | chr10, 62250kb  | chr20, 38250kb  |
| 381   | chr5, 79750kb  | chr12, 101750kb | chr2, 97250kb   | chr12, 133250kb | chr12, 16750kb  |
| 382   | chr2, 56250kb  | chr6, 33750kb   | chr11, 10750kb  | chr18, 46250kb  | chr6, 90750kb   |
| 383   | chr5, 171750kb | chr2, 70250kb   | chr6, 169750kb  | chr6, 27250kb   | chr20, 48250kb  |
| 384   | chr21, 40250kb | chr11, 103250kb | chr10, 44750kb  | chr18, 72250kb  | chr4, 184750kb  |
| 385   | chr4, 122250kb | chr13, 113750kb | chr6, 20250kb   | chr2, 125750kb  | chr6, 153750kb  |
| 386   | chr15, 37750kb | chr6, 170250kb  | chr15, 95750kb  | chr6, 20250kb   | chr20, 53750kb  |
| 387   | chr20, 6250kb  | chr17, 72750kb  | chr3, 103750kb  | chr5, 35750kb   | chr7, 121750kb  |
| 388   | chr19, 10750kb | chr2, 191750kb  | chr20, 19750kb  | chr6, 158750kb  | chr16, 87750kb  |
| 389   | chr14, 89750kb | chr12, 16750kb  | chr9, 135750kb  | chr6, 29250kb   | chr1, 92250kb   |
| 390   | chr1, 11750kb  | chr9, 34750kb   | chr12, 8750kb   | chr7, 4750kb    | chr19, 48750kb  |
| 391   | chr11, 85750kb | chr5, 105750kb  | chr2, 62250kb   | chr1, 214750kb  | chr5, 75750kb   |
| 392   | chr7, 148750kb | chr1, 66750kb   | chr3, 39750kb   | chr6, 16250kb   | chr14, 30750kb  |
| 393   | chr5, 35750kb  | chr7, 157250kb  | chr16, 78250kb  | chr10, 64750kb  | chr4, 55750kb   |
| 394   | chr20, 53750kb | chr10, 31250kb  | chr18, 68750kb  | chr5, 75750kb   | chr1, 101750kb  |
| 395   | chr1, 152750kb | chr2, 228750kb  | chr10, 81750kb  | chr7, 136250kb  | chr12, 98250kb  |
| 396   | chr11, 16250kb | chr14, 55250kb  | chr5, 158250kb  | chr7, 56750kb   | chr4, 122250kb  |

| Order | LR weight      | LR PFI         | LGBM gain      | LGBM PFI       | ResDN3 PFI     |
|-------|----------------|----------------|----------------|----------------|----------------|
| 397   | chr17, 29250kb | chr20, 10750kb | chr2, 220750kb | chr2, 229250kb | chr2, 163250kb |
| 398   | chr3, 171750kb | chr8, 58750kb  | chr3, 10250kb  | chr3, 159750kb | chr20, 43250kb |
| 399   | chr13, 68750kb | chr19, 10750kb | chr3, 119250kb | chr2, 61750kb  | chr9, 20250kb  |
| 400   | chr10, 72750kb | chr9, 95250kb  | chr2, 228750kb | chr12, 2250kb  | chr3, 194250kb |

**Table S1. Lists of the 400 most important loci.**

We list here the list of the 400 most important loci selected, when averaged over 10 different folds of the dataset, respectively by Lasso regularization with weight criterion (LR weight), Lasso regularization with permutation feature importance criterion (LR PFI), LightGBM with gain criterion (LGBM gain), LightGBM with permutation feature importance criterion (LGBM PFI), and a dense residual neural network with 3 hidden layers with permutation feature importance criterion (ResDN3 PFI). For each locus, we indicate the chromosome and the center of the corresponding 500kb window (250kb on each side), in hg19 coordinates.

## References

- [1] Pedregosa F, Varoquaux G, Gramfort A, Michel V, Thirion B, Grisel O, et al. Scikit-learn: Machine Learning in Python. *Journal of Machine Learning Research*. 2011;12:2825–2830.
- [2] Chollet F, et al. Keras; 2015. <https://keras.io>.
- [3] Abadi M, Agarwal A, Barham P, Brevdo E, Chen Z, Citro C, et al. TensorFlow: Large-Scale Machine Learning on Heterogeneous Systems; 2015. Available from: <https://www.tensorflow.org/>.
- [4] Chen T, Guestrin C. Xgboost: A scalable tree boosting system. In: *Proceedings of the 22nd acm sigkdd international conference on knowledge discovery and data mining*. ACM; 2016. p. 785–794.
- [5] Ke G, Meng Q, Finley T, Wang T, Chen W, Ma W, et al. LightGBM: A highly efficient gradient boosting decision tree. In: *Advances in Neural Information Processing Systems*; 2017. p. 3149–3157.
- [6] Prokhorenkova L, Gusev G, Vorobev A, Veronika Dorogush A, Gulin A. CatBoost: unbiased boosting with categorical features. *arXiv preprint arXiv:170609516*. 2017.
